# Supplementary material
Source: publisher figshare collection journal article supplement (https://diabetesjournals.figshare.com/ndownloader/files/24176723)
Supplement: Supplementary file 1 [file 24176723]

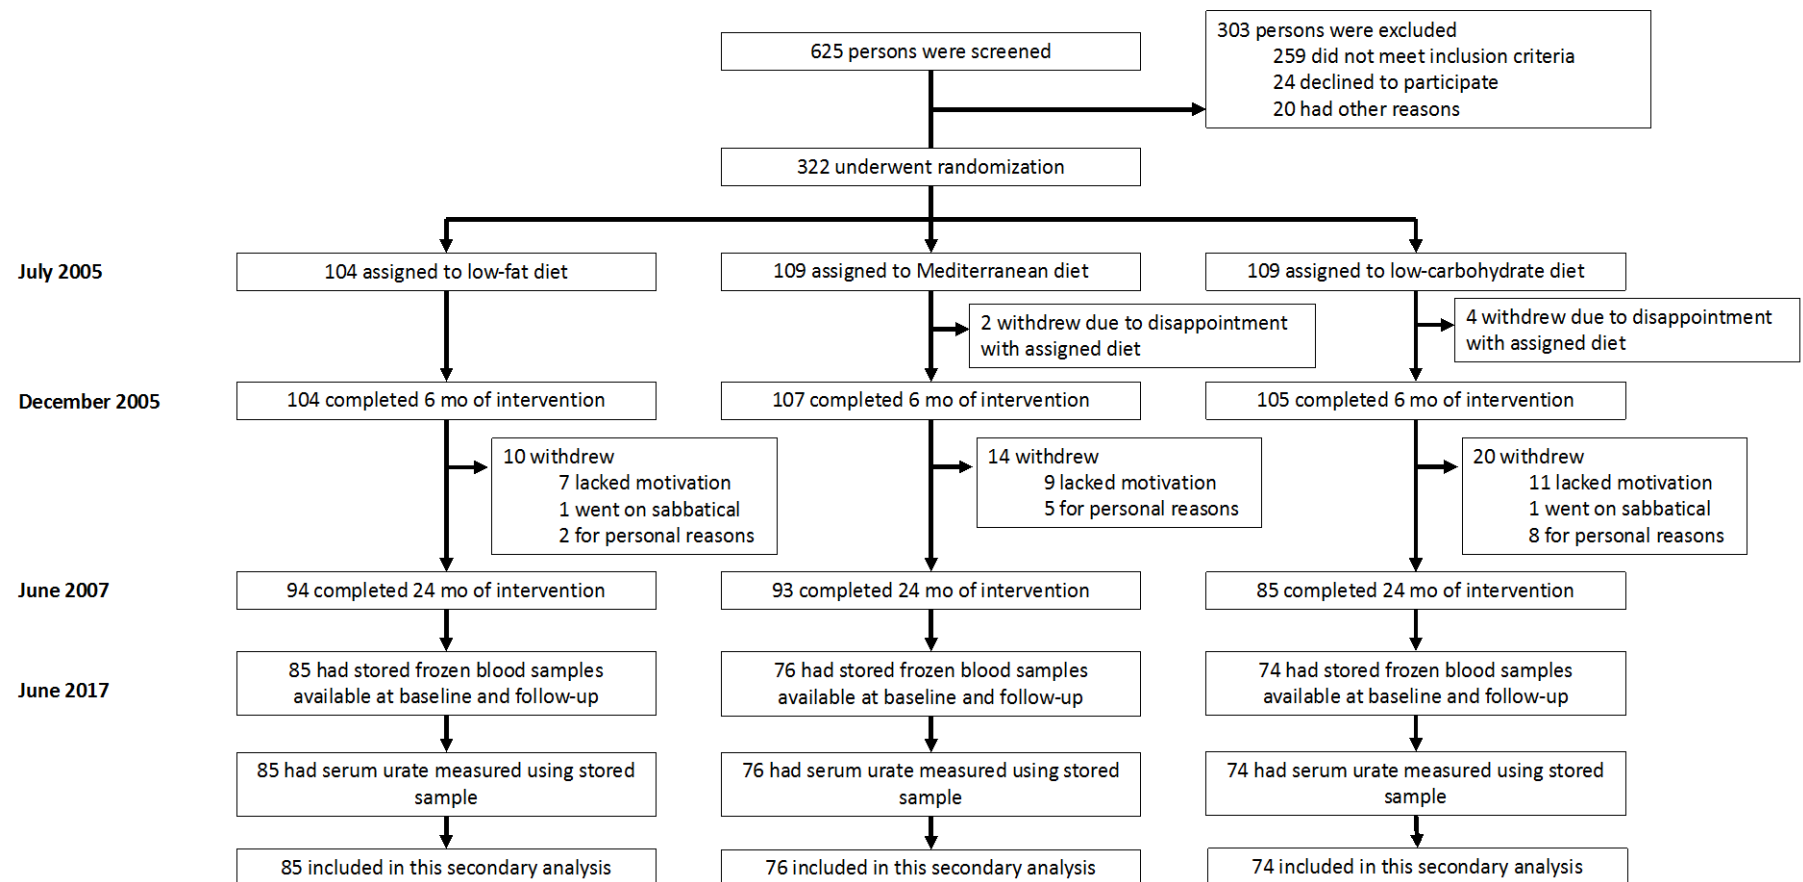

**Supplemental Figure S1: Consolidated Standards of Reporting Trials (CONSORT) Flow Diagram**

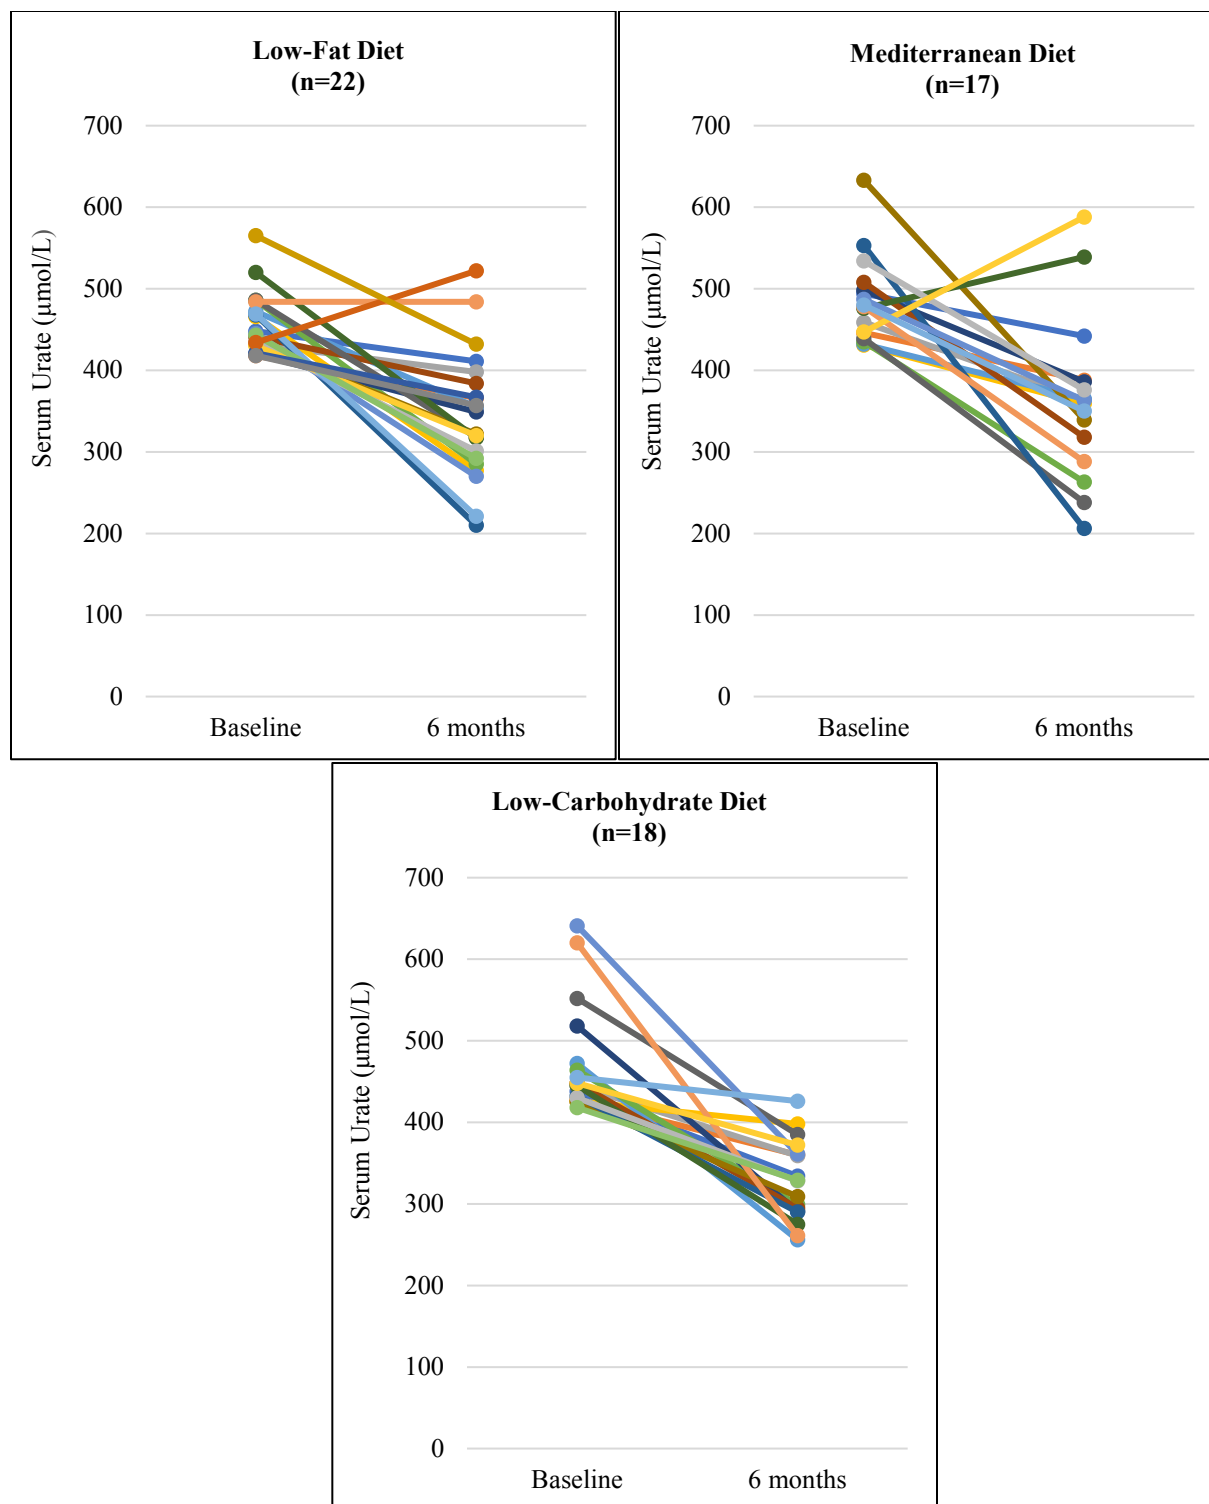

**Supplemental Figure S2. Serum Urate Change at 6 Months Among Those with Baseline Hyperuricemia, According to Assigned Diet.**

**Weight Loss**

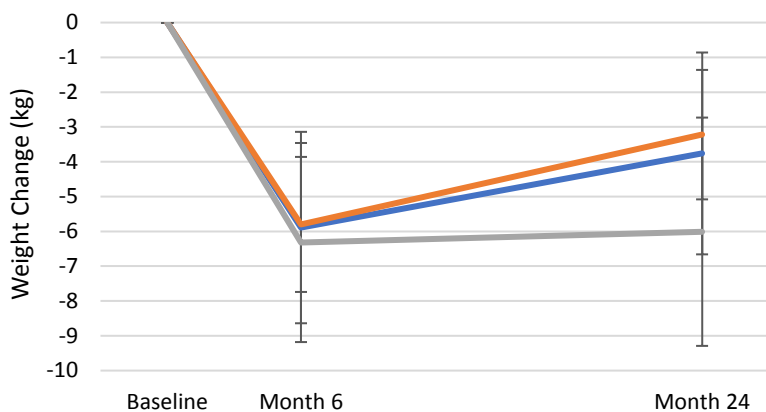

**Total Cholesterol : HDL Ratio**

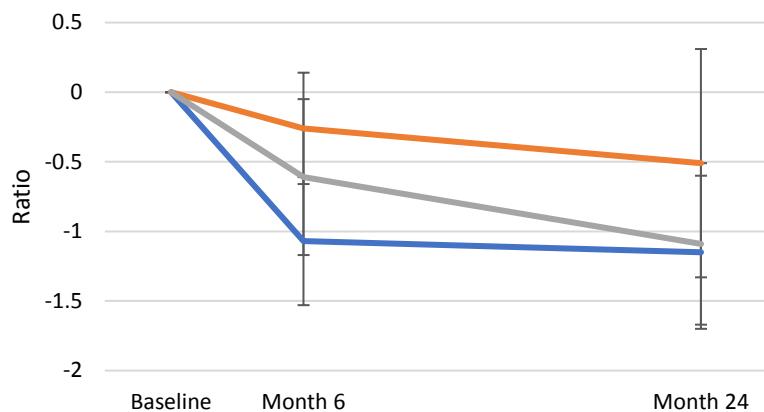

**HDL-C**

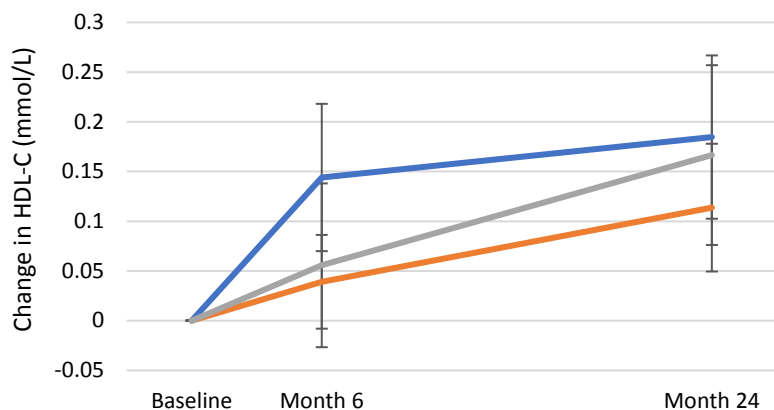

**LDL-C**

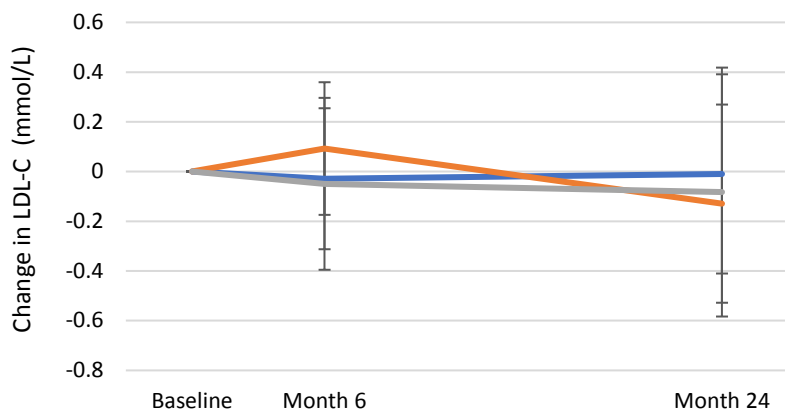

**Triglycerides**

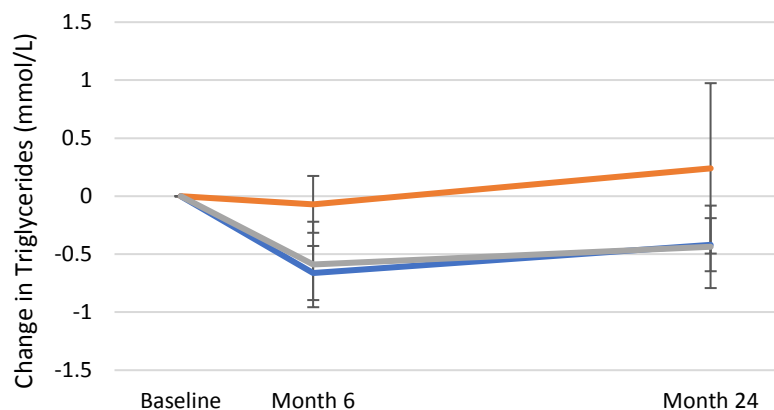

**Fasting Plasma Insulin (Persons without Diabetes)**

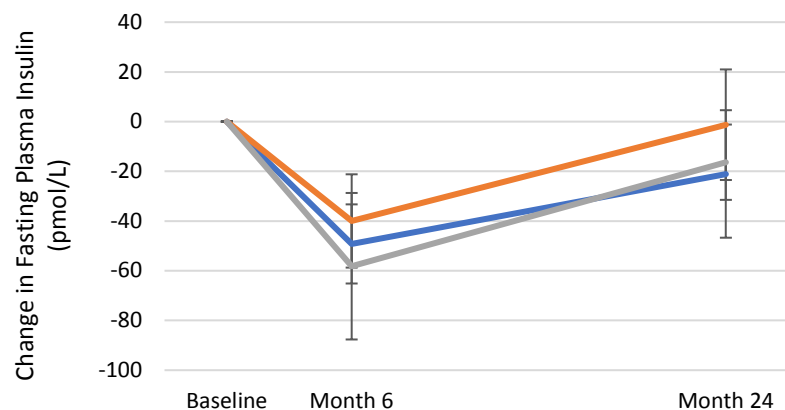

**eGFR**

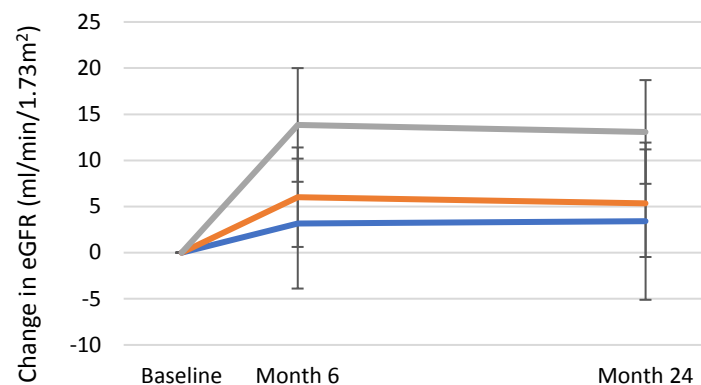

— Low-Carb Diet — Low-Fat Diet — Mediterranean Diet

**Supplemental Figure S3: Change in  
Cardiometabolic Parameters at 6- and 24-Months  
Among Participants with Baseline Hyperuricemia.**  
Vertical bars indicate standard errors.

**Supplemental Table S1. Overview of Each Diet**

| Diet                                     | Characteristics                                                                                                                                                                                                                                                                                                                                                                                                                                                                                                                                                                                                                                                |
|------------------------------------------|----------------------------------------------------------------------------------------------------------------------------------------------------------------------------------------------------------------------------------------------------------------------------------------------------------------------------------------------------------------------------------------------------------------------------------------------------------------------------------------------------------------------------------------------------------------------------------------------------------------------------------------------------------------|
| Low fat, restricted calorie              | <ul style="list-style-type: none"> <li>• Participants counseled to consume low-fat grains, vegetables, fruits, and legumes and limit added fats, sweets, and high-fat snacks</li> <li>• Up to 30% of calories from fat, 10% from saturated fat and up to 300mg cholesterol/day</li> <li>• Up to 1500kcal/day for women and 1800kcal/day for men</li> </ul>                                                                                                                                                                                                                                                                                                     |
| Mediterranean, restricted calorie        | <ul style="list-style-type: none"> <li>• Moderate-fat, rich in vegetables and low in red meat, with poultry and fish replacing beef and lamb</li> <li>• Main sources of added fat were from 30-45 grams of olive oil and a handful of nuts (5-7, &lt; 20 grams) per day</li> <li>• Up to 35% of calories from fat</li> <li>• Up to 1500kcal/day for women and 1800kcal/day for men</li> </ul>                                                                                                                                                                                                                                                                  |
| Low carbohydrate, non-restricted calorie | <ul style="list-style-type: none"> <li>• Based upon the low-carbohydrate, high-protein/fat Atkins diet</li> <li>• 20g/day of carbohydrates during the <b>induction phase</b> (first 2 months), returning to this level of severe carb restriction after each religious holiday</li> <li>• During <b>maintenance phase</b>, participants instructed to increase carbs gradually up to a maximum of 120g/day to maintain weight loss</li> <li>• Participants counseled to choose vegetarian sources of fat and protein</li> <li>• Total calories, protein and fat intake from any source (except industrial- <i>trans</i> fats), intakes not limited.</li> </ul> |

Adapted from Shai I, Schwarzfuchs D, Henkin Y, Shahar DR, Witkow S, Greenberg I, et al. Weight loss with a low-carbohydrate, Mediterranean, or low-fat diet. N Engl J Med. 2008;359(3):229-41.

**Supplemental Table S2. Sample Daily Meal Plans for Each Diet**

|                  | Low fat, restricted calorie |                 |                                         |                   | Mediterranean, restricted calorie |                   |                                      |            | Low carbohydrate, non-restricted calorie |                |                                                           |               |
|------------------|-----------------------------|-----------------|-----------------------------------------|-------------------|-----------------------------------|-------------------|--------------------------------------|------------|------------------------------------------|----------------|-----------------------------------------------------------|---------------|
|                  | Day 1                       |                 | Day 2                                   |                   | Day 1                             |                   | Day 2                                |            | Initiation Phase                         |                | Maintenance Phase                                         |               |
| <b>Breakfast</b> | Light whole-wheat bread     | 2 slices        | Low fat yogurt                          | 150g              | Coffee with 1% fat milk           |                   | Coffee with 1% fat milk              |            | Walnut                                   | 1 unit (6g)    | Sour cream 15% fat                                        | Liberal       |
|                  | Cottage cheese (5% fat)     | 75g             | Grapes                                  | 6 medium (42g)    | Light whole wheat bread           | 2 slices          | Low-fat yogurt                       | 150g       | High fat cream cheese                    | 100g           |                                                           |               |
|                  | Tomato                      | 1 medium (160g) | Plum                                    | 1 medium (70g)    | Low fat white cheese              | 2 TB              | Fruits                               | 2 units    |                                          |                |                                                           |               |
|                  |                             |                 | Granola                                 | 2 spoons (30g)    | Cucumber and tomato               | few slices each   |                                      |            |                                          |                |                                                           |               |
|                  |                             |                 |                                         |                   | Fruit                             | 1 unit            |                                      |            |                                          |                |                                                           |               |
| <b>Snack</b>     | Peach                       | 1 medium (160g) |                                         |                   |                                   |                   |                                      |            |                                          |                |                                                           |               |
| <b>Lunch</b>     | Roast chicken breast        | 150g            | Chicken legs, baked, w/o skin           | 2 units           | Grilled fish                      | 1 portion, 150 gr | Greek salad with low-fat feta cheese | Big bowl   | Fried chicken breast                     | Liberal        | Fish, chicken, or beef, fried or roasted, not breaded     | Liberal       |
|                  | Roast potatoes              | 2 medium (140g) | Spaghetti in tomato sauce               | 1 cup (150g)      | Cooked chickpeas                  | 1 cup             | Olive oil                            | 1.5 TB     | Cucumber                                 | 1 small (82g)  | Stir fried zucchini with herbs                            | ½ cup         |
|                  | Cabbage salad               | 100g            | Mixed vegetable salad, low-fat dressing | 1 cup (150g)      | Fresh and cooked vegetable salad  | 1 cup             | Cooked peas                          | ½ cup      | Tomato                                   | 1 small (80g)  | Roasted eggplants                                         | ½ cup         |
|                  |                             |                 |                                         |                   | Olive oil                         | 1.5 TB            | Whole wheat rice                     | ½ cup      | Tahini                                   | 2 T            | Fresh vegetable salad with 2 tablespoons (17 g) of tahini | 2 cups        |
| <b>Snack</b>     | Low fat yogurt              | 150g            | Whole-wheat cracker                     | 2 crackers        | Low-fat yogurt                    | 150g              | Light whole wheat bread              | 1 slice    | Turkey pastrami                          | 2 slices (64g) | Almond cookies (with eggs, almonds and sugar substitute)  | 2 small (12g) |
|                  | Energy bar                  | 1 bar (43g)     | Strawberry jam                          | 2 teaspoons (12g) | Fresh vegetables                  | few slices        | Low-fat white cheese                 | 2 TB       |                                          |                |                                                           |               |
|                  |                             |                 |                                         |                   | Fruit                             | 1 unit            | Fresh vegetables                     | few slices |                                          |                |                                                           |               |
|                  |                             |                 |                                         |                   |                                   |                   | Fruit                                | 1 unit     |                                          |                |                                                           |               |

|               | Low fat, restricted calorie    |               |                      |                 | Mediterranean, restricted calorie |            |                         |            | Low carbohydrate, non-restricted calorie |                 |                                                   |                |
|---------------|--------------------------------|---------------|----------------------|-----------------|-----------------------------------|------------|-------------------------|------------|------------------------------------------|-----------------|---------------------------------------------------|----------------|
|               | Day 1                          |               | Day 2                |                 | Day 1                             |            | Day 2                   |            | Initiation Phase                         |                 | Maintenance Phase                                 |                |
| <b>Dinner</b> | Whole-wheat bread              | 2 slices      | Whole-wheat bread    | 2 slices        | Light whole wheat bread           | 2 slices   | Light whole wheat bread | 2 slices   | Tuna fish preserved in oil               | Liberal         | Cream cheese                                      | 250g           |
|               | Hard cheese (9% fat)           | 1 slice (20g) | Low fat cream cheese | 35g             | Low fat white cheese              | 3 TB       | Low fat white cheese    | 3 TB       | Fried eggs                               | Liberal         | Broccoli and mushrooms coated with eggs, no flour | ½ cup          |
|               | Carrot salad, low-fat dressing | 200g          | Smoked salmon        | 50g             | Fresh vegetable salad             | 1 cup      | Fresh vegetable salad   | 1 cup      | Avocado                                  | Liberal         | Tuna                                              | Liberal        |
|               |                                |               | Tomato               | 1 medium (160g) | Olive oil                         | 1 TB       | Olive oil               | 1 TB       | Cucumber                                 | 2 medium (160g) | Olives                                            | Liberal        |
|               |                                |               |                      |                 | Walnuts                           | 5 units    | Walnuts                 | 5 units    | Lettuce                                  | 1 cup (55g)     |                                                   |                |
| <b>Night</b>  |                                |               |                      |                 |                                   |            | Hard boiled egg         | 1 unit     |                                          |                 |                                                   |                |
|               |                                |               |                      |                 |                                   |            | Chickpeas, cooked       | ½ cup      |                                          |                 |                                                   |                |
|               | Watermelon                     | 250g          | Low fat yogurt       | 150g            | Fresh vegetables                  | few slices | Fresh vegetables        | few slices |                                          |                 | Fruit flavor diet yogurt                          | 150g           |
|               |                                |               | Banana               | 1 medium (100g) | Fruit                             | 1 unit     | Fruit                   | 1 unit     |                                          |                 | Walnuts                                           | 5 units (28g)  |
|               |                                |               |                      |                 |                                   |            |                         |            |                                          |                 | Apple                                             | 1 small (100g) |

Adapted from Shai I, Schwarzfuchs D, Henkin Y, Shahar DR, Witkow S, Greenberg I, et al. Weight loss with a low-carbohydrate, Mediterranean, or low-fat diet. N Engl J Med. 2008;359(3):229-41.

**Supplemental Table S3. Baseline Characteristics of Included Subjects and Those Not Included in Analysis Due to Missing Serum Urate**

| <b>Baseline Characteristics*</b>          | <b>Included Subjects<br/>(n=235)</b> | <b>Excluded Subjects<br/>(n=87)</b> |
|-------------------------------------------|--------------------------------------|-------------------------------------|
| <b>Age, years</b>                         | 51.5 ± 6.3                           | 50.3 ± 6.4                          |
| <b>Male, N (%)</b>                        | 206 (87.7)                           | 71 (81.6)                           |
| <b>SU, µmol/L (mg/dL)</b>                 | 363 ± 83 (6.1 ± 1.4)                 | -                                   |
| <b>SU ≥ 416 µmol/L (≥ 7 mg/dL), N (%)</b> | 57 (24.3)                            | -                                   |
| <b>BMI, kg/m<sup>2</sup></b>              | 30.5 ± 3.3                           | 32.1 ± 4.2                          |
| <b>Weight, kg</b>                         | 90.0 ± 13.0                          | 95.3 ± 13.8                         |
| <b>Diabetes, N (%)</b>                    | 34 (14.5)                            | 12 (13.8)                           |
| <b>Coronary heart disease, N (%)</b>      | 85 (36.2)                            | 33 (37.9)                           |
| <b>Blood pressure, mm Hg</b>              |                                      |                                     |
| <b>Systolic</b>                           | 130.2 ± 14.3                         | 132.9 ± 15.1                        |
| <b>Diastolic</b>                          | 78.9 ± 9.1                           | 80.8 ± 9.3                          |
| <b>Lipid profile</b>                      |                                      |                                     |
| <b>HDL, mmol/L</b>                        | 1.00±0.24                            | 0.98±0.23                           |
| <b>Triglycerides, mmol/L</b>              | 1.86±0.80                            | 2.13±1.39                           |
| <b>Total cholesterol : HDL ratio</b>      | 5.3 ± 1.4                            | 5.7 ± 2.0                           |
| <b>eGFR, ml/minute/1.73 m<sup>2</sup></b> | 96.1 ± 21.5                          | 97.0 ± 22.8                         |
| <b>HOMA-IR</b>                            | 3.2 ± 2.6                            | 3.4 ± 2.4                           |
| <b>Statins, N (%)</b>                     | 52 (22.1)                            | 20 (21.0)                           |
| <b>Antihypertensive therapy, N (%)</b>    | 72 (30.6)                            | 24 (27.6)                           |
| <b>Diuretics, N (%)</b>                   | 18 (7.7)                             | 8 (9.2)                             |

\*Unless indicated otherwise, values are the mean ± standard deviation.

Abbreviations: SU – serum urate; BMI – body mass index; HDL – high-density lipoprotein; eGFR – estimated glomerular filtration rate; HOMA-IR – homeostasis model assessment of insulin resistance
